# Supplementary material
Source: PubMed Central journal article supplement (PMC5940500)
Supplement: NIHMS954350-supplement-1.pdf [file NIHMS954350-supplement-1.pdf]

## Supplemental Figures 1-8

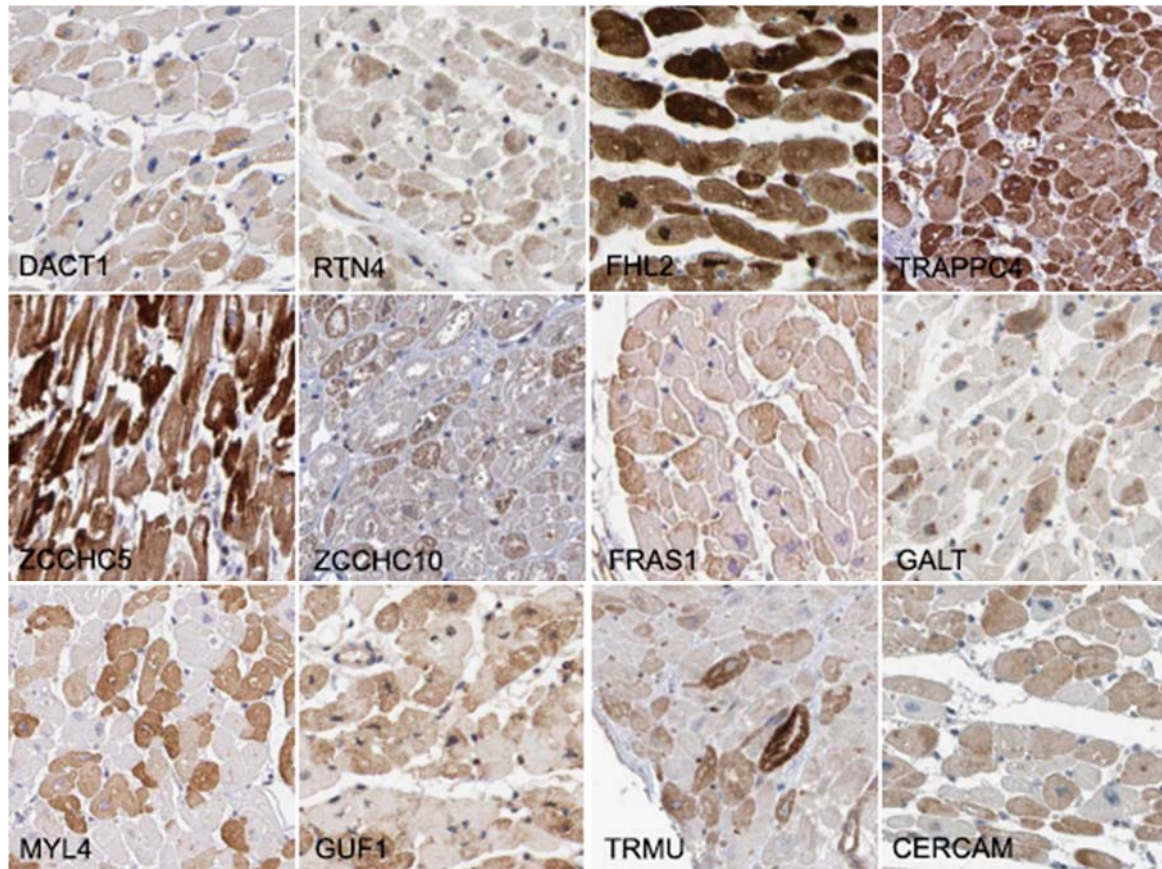

**Supplemental Figure 1.** Twelve protein examples of mosaic pattern staining of the myocardium. All images are from the Human Protein Atlas [16].

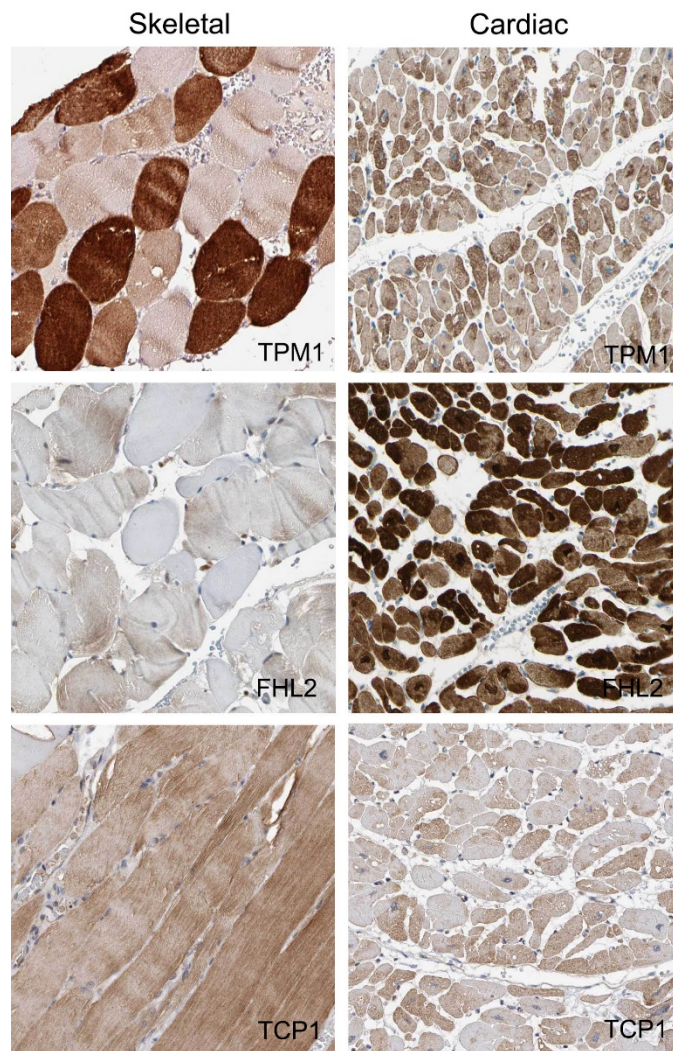

**Supplemental Figure 2.** A representative comparison of skeletal and cardiac images of three proteins. For tropomyosin 1 (TPM1), there is a strong mosaic pattern of expression in skeletal muscle with a less clear pattern in myocardium. For Four and a half LIM domains 2 (FHL2), there is a weak pattern of skeletal mosaicism, with a stronger cardiac mosaicism. For T-complex 1 (TCP1), the skeletal myocytes have homogenous expression while there is heterogeneous expression in cardiac myocytes. All images from the Human Protein Atlas.

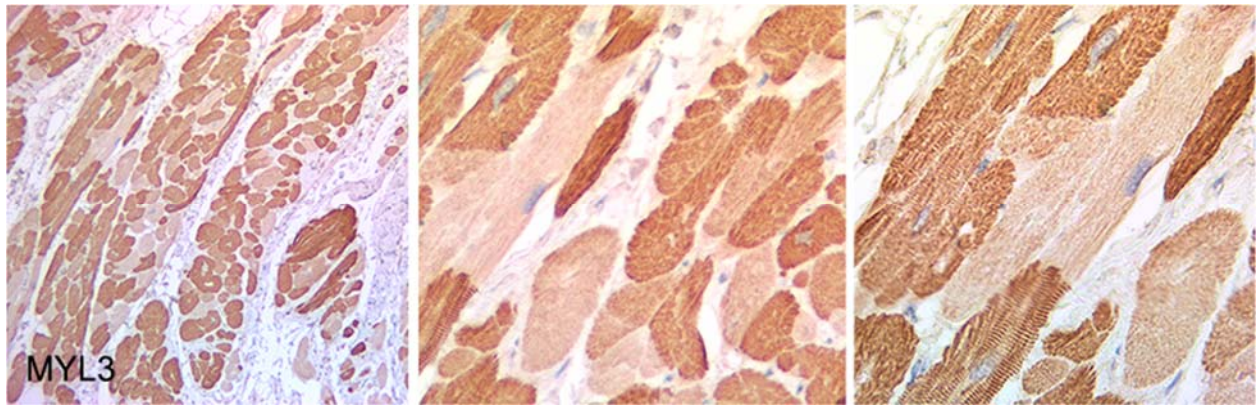

**Supplemental Figure 3.** Examples of atrial MYL3 staining from medium (100x) to high (400x) resolution demonstrating the variable expression of adjacent myocytes for MYL3.

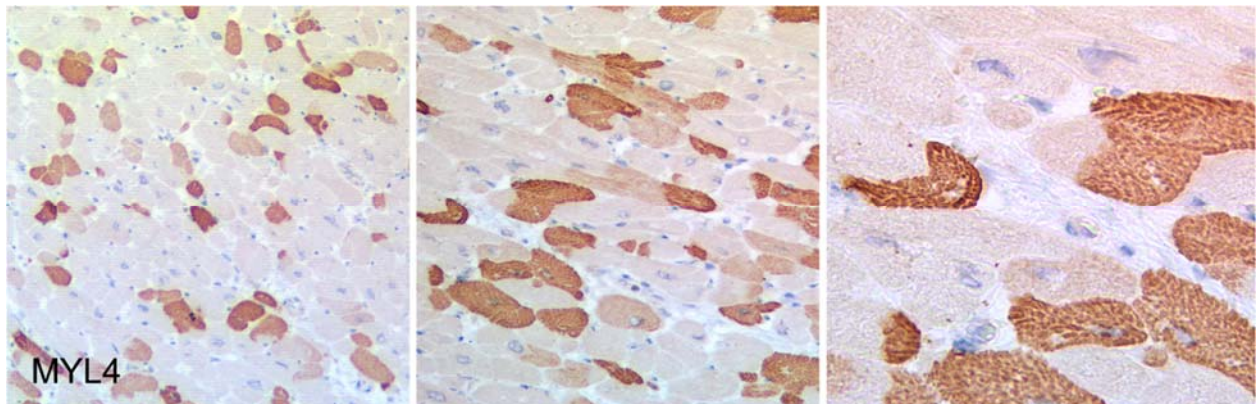

**Supplemental Figure 4.** Examples of ventricular MYL4 staining from medium (100x) to high (400x) resolution demonstrating the variable expression of adjacent myocytes for MYL4.

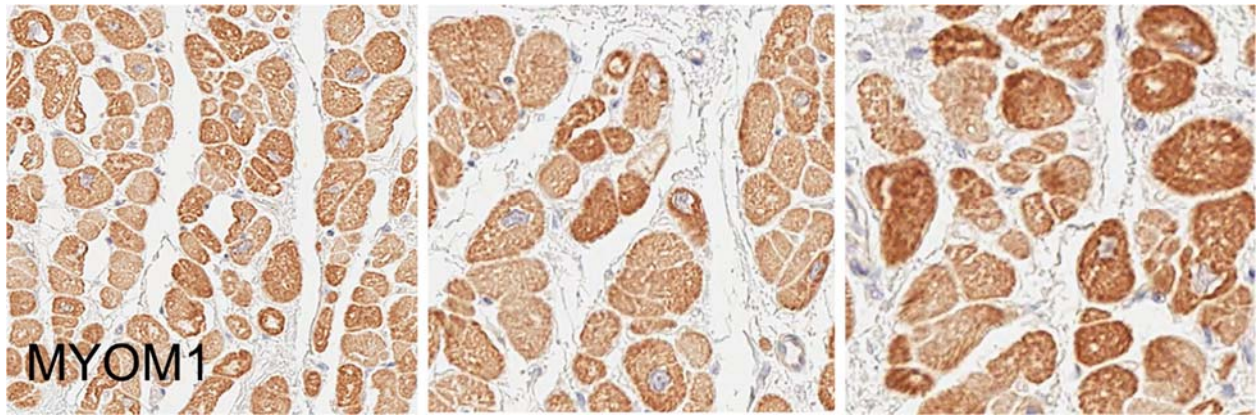

**Supplemental Figure 5.** Examples of atrial MYOM1 staining from medium (100x) to high (200x) resolution demonstrating the variable expression of adjacent myocytes for MYL4.

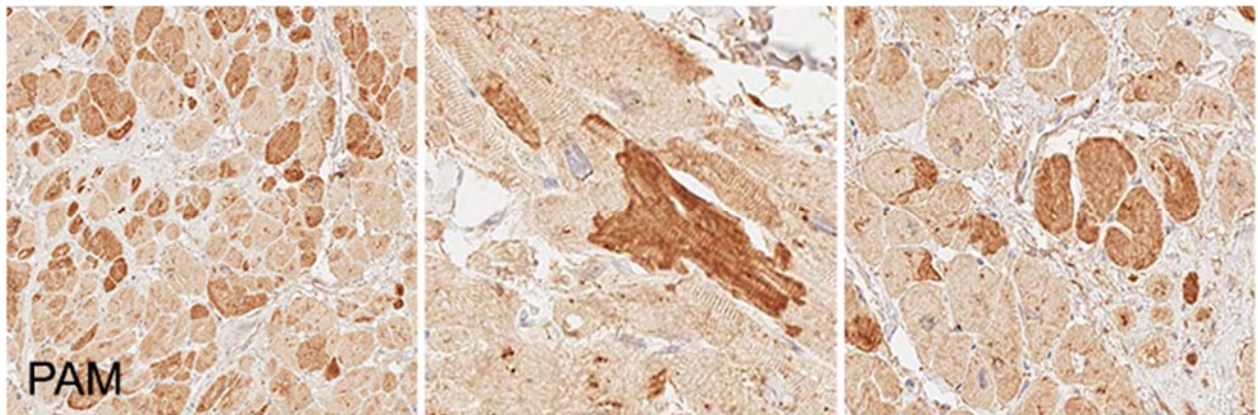

**Supplemental Figure 6.** Examples of PAM ventricular staining from medium (100x) to high (200x) resolution demonstrating the variable expression of adjacent myocytes for MYL4.

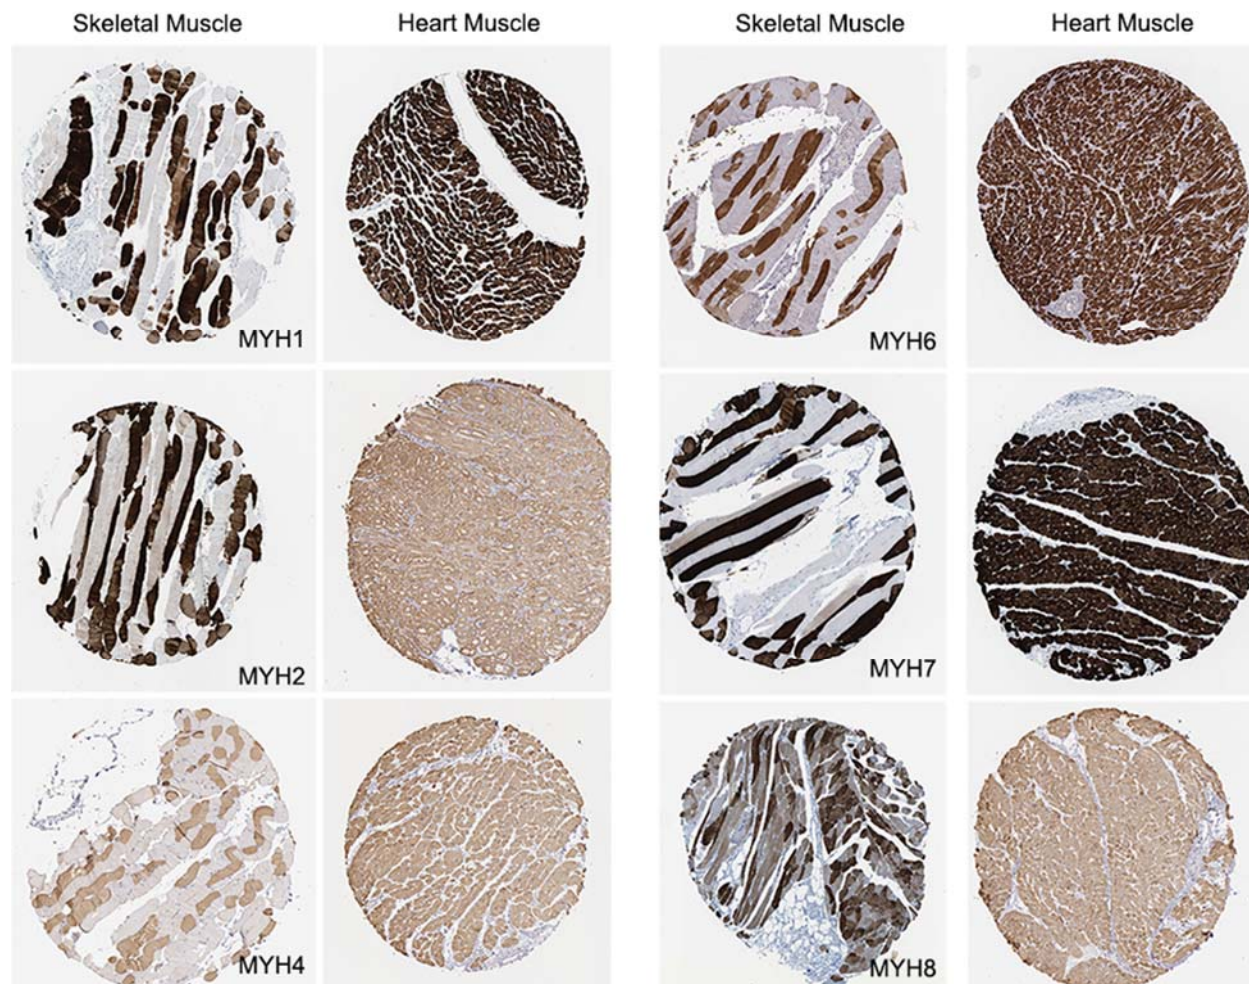

**Supplemental Figure 7.** Representative comparisons of myosin heavy chain (MYH) staining between skeletal muscle and cardiac muscle. For these 6 representative MYH proteins that are mosaic in the skeletal muscle, none are mosaic in heart.

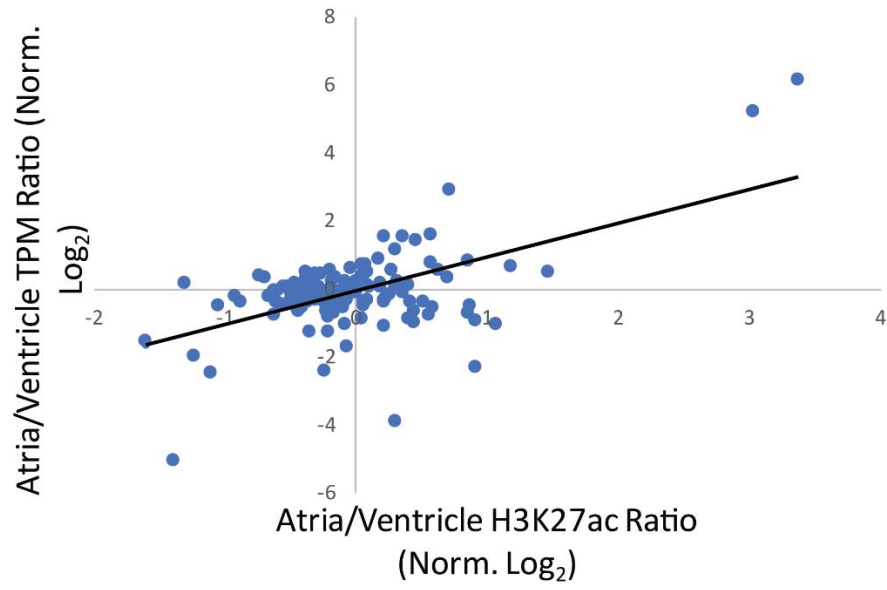

**Supplemental Figure 8.** Correlation between mosaic atrial/ventricular gene expression ratio (in Log<sub>2</sub> TPM) and atrial/ventricular H3K27ac ratio (in Log<sub>2</sub>). A Pearson correlation coefficient=0.55.
